# Supplementary material for: Comparing In-Plane Equivalent Shear Stiffness of Timber Diaphragms Retrofitted with Light and Reversible Wood-Based Techniques
Source: Atypon-hosted journal article supplement (doi:10.1061/(asce)sc.1943-5576.0000602), 2021-07-15
Supplement: supplemental_materials_sc.1943-5576.0000602_mirra.pdf [file supplemental_materials_sc.1943-5576.0000602_mirra.pdf]

## SUPPLEMENTAL MATERIALS

*ASCE Practice Periodical on Structural Design and Construction*

# Comparing In-Plane Equivalent Shear Stiffness of Timber Diaphragms Retrofitted with Light and Reversible Wood-Based Techniques

Michele Mirra, Geert Ravenshorst, and Jan-Willem van de Kuilen

**DOI:** 10.1061/(ASCE)SC.1943-5576.0000602

© ASCE 2021

[www.ascelibrary.org](http://www.ascelibrary.org)

## **Supplemental material: detailed overview of diaphragms properties**

In this document, the properties of the analysed floors are reported to provide the Readers with a detailed overview of them, and may constitute a useful database for future studies. In the tables, the diaphragms are distinguished between original (*O*) and strengthened (*S*).

**Table S1.** Characteristics of the as-built and strengthened floors tested by Valluzzi et al. (2008) and values of their in-plane stiffness.

| <b>Test configuration</b>          |         | Vertical, 1/4 of the floor, with 1 point of application of load |                                          |                                              |                                              |
|------------------------------------|---------|-----------------------------------------------------------------|------------------------------------------|----------------------------------------------|----------------------------------------------|
| <b>Specimen name</b>               |         | <i>FMSB (F1.M; O)</i>                                           | <i>FM (F2.M; O)</i>                      | <i>FM+45°SP(A) (S)</i>                       | <i>FM+45°SP(B) (S)</i>                       |
| <b>Floor dimensions</b>            |         |                                                                 |                                          |                                              |                                              |
| Orthogonal to load                 | [mm]    | 2120                                                            | 2120                                     | 2120                                         | 2120                                         |
| Parallel to load                   | [mm]    | 2120                                                            | 2120                                     | 2120                                         | 2120                                         |
| Total thickness                    | [mm]    | 160                                                             | 160                                      | 185                                          | 200                                          |
| <b>Properties of main beams</b>    |         |                                                                 |                                          |                                              |                                              |
| Width                              | [mm]    | 120                                                             | 120                                      | 120                                          | 120                                          |
| Height                             | [mm]    | 140                                                             | 140                                      | 140                                          | 140                                          |
| Length                             | [mm]    | 2420                                                            | 2420                                     | 2420                                         | 2420                                         |
| Heart-to-heart distance            | [mm]    | 500                                                             | 500                                      | 500                                          | 500                                          |
| Material                           |         | Spruce wood                                                     | Spruce wood                              | Spruce wood                                  | Spruce wood                                  |
| <b>Properties of planking</b>      |         |                                                                 |                                          |                                              |                                              |
| Width                              | [mm]    | 135                                                             | 135                                      | 135                                          | 135                                          |
| Thickness                          | [mm]    | 20                                                              | 20                                       | 20                                           | 20                                           |
| Length                             | [mm]    | 2120                                                            | 2120                                     | 2120                                         | 2120                                         |
| Material                           |         | Spruce wood                                                     | Spruce wood                              | Spruce wood                                  | Spruce wood                                  |
| Other characteristics              |         | Straight-edged planks                                           | Tongue-and-groove planks                 | Straight-edged planks                        | Tongue-and-groove planks                     |
| <b>Beams-planks connections</b>    |         |                                                                 |                                          |                                              |                                              |
| Fastener type                      |         | Nails                                                           | Nails                                    | Nails                                        | Nails                                        |
| Diameter                           | [mm]    | 2.75                                                            | 2.75                                     | 2.75                                         | 2.75                                         |
| Length                             | [mm]    | 60                                                              | 60                                       | 60                                           | 60                                           |
| Other characteristics              |         | 2 nails for each beam-plank intersection                        | 2 nails for each beam-plank intersection | 2 nails for each beam-plank intersection     | 2 nails for each beam-plank intersection     |
| <b>Properties of strengthening</b> |         |                                                                 |                                          |                                              |                                              |
| Type of strengthening              |         | Not applicable (as-built sample)                                | Not applicable (as-built sample)         | Second layer of planks at an angle of 45°    | Second layer of planks at an angle of 45°    |
| Width                              | [mm]    | -                                                               | -                                        | 150                                          | 150                                          |
| Thickness                          | [mm]    | -                                                               | -                                        | 25                                           | 40                                           |
| Length                             | [mm]    | -                                                               | -                                        | Variable                                     | Variable                                     |
| Material                           |         | -                                                               | -                                        | Spruce wood                                  | Spruce wood                                  |
| Other characteristics              |         | -                                                               | -                                        | Straight-edged planks                        | Tongue-and-groove planks                     |
| Fastener type                      |         | -                                                               | -                                        | Screws                                       | Screws                                       |
| Diameter                           | [mm]    | -                                                               | -                                        | 6                                            | 6                                            |
| Length                             | [mm]    | -                                                               | -                                        | 100                                          | 120                                          |
| Other characteristics              |         | -                                                               | -                                        | 2 screws at each new plank-beam intersection | 2 screws at each new plank-beam intersection |
| <b>In-plane stiffness</b>          |         |                                                                 |                                          |                                              |                                              |
| Value reported in the publication  | [kN/mm] | 0.08                                                            | 0.29                                     | 1.18                                         | 1.25                                         |
| Value at 0.1% drift                | [kN/mm] | 0.15                                                            | 0.31                                     | 2.06                                         | 2.13                                         |
| Value at 1.0% drift                | [kN/mm] | 0.04                                                            | 0.06                                     | 0.71                                         | 0.72                                         |
| Value at yielding (and drift)      | [kN/mm] | 0.10 (0.12%)                                                    | 0.33 (0.12%)                             | 1.89 (0.3%)                                  | 1.89 (0.3%)                                  |
| <b>Equivalent shear stiffness</b>  |         |                                                                 |                                          |                                              |                                              |
| Value calculated from publication  | [N/mm]  | 81                                                              | 288                                      | 1176                                         | 1247                                         |
| Value at 0.1% drift                | [N/mm]  | 152                                                             | 313                                      | 2065                                         | 2128                                         |
| Value at 1.0% drift                | [N/mm]  | 43                                                              | 62                                       | 707                                          | 719                                          |
| Value at yielding                  | [N/mm]  | 100                                                             | 330                                      | 1890                                         | 1890                                         |

**Table S2.** Characteristics of the as-built and strengthened floors tested by Corradi et al. (2006) and values of their in-plane stiffness.

| <b>Test configuration</b>            |         | Horizontal, half of the floor, with 1 point of application of load |                                  |                                               |
|--------------------------------------|---------|--------------------------------------------------------------------|----------------------------------|-----------------------------------------------|
| <b>Specimen name</b>                 |         | <i>01-T2-OR (O)</i>                                                | <i>02-T6-OR (O)</i>              | <i>03-T4-T6 (S)</i>                           |
| <b>Floor dimensions</b>              |         |                                                                    |                                  |                                               |
| Orthogonal to load                   | [mm]    | 3000                                                               | 3000                             | 3000                                          |
| Parallel to load                     | [mm]    | 3000                                                               | 3000                             | 3000                                          |
| Total thickness                      | [mm]    | 288                                                                | 288                              | 316                                           |
| <b>Properties of main beams</b>      |         |                                                                    |                                  |                                               |
| Width                                | [mm]    | 180                                                                | 180                              | 180                                           |
| Height                               | [mm]    | 180                                                                | 180                              | 180                                           |
| Length                               | [mm]    | 3100                                                               | 3100                             | 3100                                          |
| Heart-to-heart distance              | [mm]    | 1100                                                               | 1100                             | 1100                                          |
| Material                             |         | Chestnut wood                                                      | Chestnut wood                    | Chestnut wood                                 |
| <b>Properties of secondary beams</b> |         |                                                                    |                                  |                                               |
| Width                                | [mm]    | 80                                                                 | 80                               | 80                                            |
| Height                               | [mm]    | 80                                                                 | 80                               | 80                                            |
| Length                               | [mm]    | 1100                                                               | 1100                             | 1100                                          |
| Heart-to-heart distance              | [mm]    | 300                                                                | 300                              | 300                                           |
| Material                             |         | Chestnut wood                                                      | Chestnut wood                    | Chestnut wood                                 |
| <b>Properties of planking</b>        |         |                                                                    |                                  |                                               |
| Width                                | [mm]    | 125                                                                | 125                              | 125                                           |
| Thickness                            | [mm]    | 28                                                                 | 28                               | 28                                            |
| Length                               | [mm]    | 600                                                                | 600                              | 600                                           |
| Material                             |         | Chestnut wood                                                      | Chestnut wood                    | Chestnut wood                                 |
| Other characteristics                |         | Notched planks                                                     | Notched planks                   | Notched planks                                |
| <b>Beams-planks connections</b>      |         |                                                                    |                                  |                                               |
| Fastener type                        |         | Nails                                                              | Nails                            | Nails                                         |
| Diameter                             | [mm]    | Not mentioned                                                      | Not mentioned                    | Not mentioned                                 |
| Length                               | [mm]    | Not mentioned                                                      | Not mentioned                    | Not mentioned                                 |
| Other characteristics                |         | 1 nail at planks' ends                                             | 3 nails at planks' ends          | 2 nails at planks' ends                       |
| <b>Properties of strengthening</b>   |         |                                                                    |                                  |                                               |
| Type of strengthening                |         | Not applicable (as-built sample)                                   | Not applicable (as-built sample) | Second layer of planks at an angle of 90°     |
| Width                                | [mm]    | -                                                                  | -                                | 125                                           |
| Thickness                            | [mm]    | -                                                                  | -                                | 28                                            |
| Length                               | [mm]    | -                                                                  | -                                | 600                                           |
| Material                             |         | -                                                                  | -                                | Chestnut wood                                 |
| Other characteristics                |         | -                                                                  | -                                | Notched planks                                |
| Fastener type                        |         | -                                                                  | -                                | Nails                                         |
| Diameter                             | [mm]    | -                                                                  | -                                | Not mentioned                                 |
| Length                               | [mm]    | -                                                                  | -                                | Not mentioned                                 |
| Other characteristics                |         | -                                                                  | -                                | 2 nails at planks' ends and 2 in their middle |
| <b>In-plane stiffness</b>            |         |                                                                    |                                  |                                               |
| Value reported in the publication    | [kN/mm] | 0.47                                                               | 0.28                             | 1.71                                          |
| Value at 0.1% drift                  | [kN/mm] | 0.71                                                               | 0.77                             | 2.19                                          |
| Value at 1.0% drift                  | [kN/mm] | 0.13                                                               | 0.20                             | 0.40                                          |
| Value at yielding (and drift)        | [kN/mm] | 0.23 (0.07%)                                                       | 0.26 (0.08%)                     | 2.19 (0.1%)                                   |
| <b>Equivalent shear stiffness</b>    |         |                                                                    |                                  |                                               |
| Value calculated from publication    | [N/mm]  | 470                                                                | 280                              | 1710                                          |
| Value at 0.1% drift                  | [N/mm]  | 710                                                                | 771                              | 2190                                          |
| Value at 1.0% drift                  | [N/mm]  | 128                                                                | 204                              | 400                                           |
| Value at yielding                    | [N/mm]  | 230                                                                | 255                              | 2190                                          |

**Table S3.** Characteristics of the as-built and strengthened floors tested by Branco et al. (2015) and values of their in-plane stiffness.

| <b>Test configuration</b>          |         | Vertical, 1/4 of the floor, with 1 point of application of load |                                                                       |
|------------------------------------|---------|-----------------------------------------------------------------|-----------------------------------------------------------------------|
| <b>Specimen name</b>               |         | S (O)                                                           | SS (S)                                                                |
| <b>Floor dimensions</b>            |         |                                                                 |                                                                       |
| Orthogonal to load                 | [mm]    | 2125                                                            | 2125                                                                  |
| Parallel to load                   | [mm]    | 2125                                                            | 2125                                                                  |
| Total thickness                    | [mm]    | 180                                                             | 200                                                                   |
| <b>Properties of main beams</b>    |         |                                                                 |                                                                       |
| Width                              | [mm]    | 100                                                             | 100                                                                   |
| Height                             | [mm]    | 160                                                             | 160                                                                   |
| Length                             | [mm]    | 2420                                                            | 2420                                                                  |
| Heart-to-heart distance            | [mm]    | 500                                                             | 500                                                                   |
| Material                           |         | C24 timber                                                      | C24 timber                                                            |
| <b>Properties of planking</b>      |         |                                                                 |                                                                       |
| Width                              | [mm]    | 125                                                             | 125                                                                   |
| Thickness                          | [mm]    | 20                                                              | 20                                                                    |
| Length                             | [mm]    | 2125                                                            | 2125                                                                  |
| Material                           |         | <i>Andira Vermifuga</i> wood                                    | <i>Andira Vermifuga</i> wood                                          |
| Other characteristics              |         | Straight-edged planks                                           | Straight-edged planks                                                 |
| <b>Beams-planks connections</b>    |         |                                                                 |                                                                       |
| Fastener type                      |         | Nails                                                           | Nails                                                                 |
| Diameter                           | [mm]    | 2.50                                                            | 2.50                                                                  |
| Length                             | [mm]    | 60                                                              | 60                                                                    |
| Other characteristics              |         | 2 nails for each intersection between beam and plank            | 2 nails for each intersection between beam and plank                  |
| <b>Properties of strengthening</b> |         |                                                                 |                                                                       |
| Type of strengthening              |         | Not applicable (as-built sample)                                | Superposition of a second layer of planks arranged at 90°             |
| Width                              | [mm]    | -                                                               | 125                                                                   |
| Thickness                          | [mm]    | -                                                               | 20                                                                    |
| Length                             | [mm]    | -                                                               | 2125                                                                  |
| Material                           |         | -                                                               | <i>Andira Vermifuga</i> wood                                          |
| Other characteristics              |         | -                                                               | Straight-edged planks                                                 |
| Fastener type                      |         | -                                                               | Nails                                                                 |
| Diameter                           | [mm]    | -                                                               | 2.50                                                                  |
| Length                             | [mm]    | -                                                               | 60                                                                    |
| Other characteristics              |         | -                                                               | 2 nails at each intersection of the new planks with the existing ones |
| <b>In-plane stiffness</b>          |         |                                                                 |                                                                       |
| Value reported in the publication  | [kN/mm] | 0.05                                                            | 0.13                                                                  |
| Value at 0.1% drift                | [kN/mm] | 0.15                                                            | 0.61                                                                  |
| Value at 1.0% drift                | [kN/mm] | 0.05                                                            | 0.16                                                                  |
| Value at yielding                  | [kN/mm] | 0.16 (at 0.14% drift)                                           | 0.61 (at 0.1% drift)                                                  |
| <b>Equivalent shear stiffness</b>  |         |                                                                 |                                                                       |
| Value calculated from publication  | [N/mm]  | 55                                                              | 132                                                                   |
| Value at 0.1% drift                | [N/mm]  | 153                                                             | 609                                                                   |
| Value at 1.0% drift                | [N/mm]  | 53                                                              | 165                                                                   |
| Value at yielding                  | [N/mm]  | 165                                                             | 609                                                                   |

**Table S4.** Characteristics of the as-built and strengthened floors tested by Gubana and Melotto (2018) and values of their in-plane stiffness.

| <b>Test configuration</b>          |         | Vertical, half of the floor, with 1 point of application of load |                                                                         |                                                   |
|------------------------------------|---------|------------------------------------------------------------------|-------------------------------------------------------------------------|---------------------------------------------------|
| <b>Specimen name</b>               |         | <i>UR-2 (O)</i>                                                  | <i>OSB90-R-2 (S)</i>                                                    | <i>OSB0-S-2 (S)</i>                               |
| <b>Floor dimensions</b>            |         |                                                                  |                                                                         |                                                   |
| Orthogonal to load                 | [mm]    | 3160                                                             | 3160                                                                    | 3160                                              |
| Parallel to load                   | [mm]    | 3000                                                             | 3000                                                                    | 3000                                              |
| Total thickness                    | [mm]    | 183                                                              | 208                                                                     | 208                                               |
| <b>Properties of main beams</b>    |         |                                                                  |                                                                         |                                                   |
| Width                              | [mm]    | 160                                                              | 160                                                                     | 160                                               |
| Height                             | [mm]    | 160                                                              | 160                                                                     | 160                                               |
| Length                             | [mm]    | 3160                                                             | 3160                                                                    | 3160                                              |
| Heart-to-heart distance            | [mm]    | 500                                                              | 500                                                                     | 500                                               |
| Material                           |         | GL24h timber                                                     | GL24h timber                                                            | GL24h timber                                      |
| <b>Properties of planking</b>      |         |                                                                  |                                                                         |                                                   |
| Width                              | [mm]    | 145                                                              | 145                                                                     | 145                                               |
| Thickness                          | [mm]    | 23                                                               | 23                                                                      | 23                                                |
| Length                             | [mm]    | 3160                                                             | 3160                                                                    | 3160                                              |
| Material                           |         | C24 timber                                                       | C24 timber                                                              | C24 timber                                        |
| Other characteristics              |         | Straight-edged planks                                            | Straight-edged planks                                                   | Straight-edged planks                             |
| <b>Beams-planks connections</b>    |         |                                                                  |                                                                         |                                                   |
| Fastener type                      |         | Nails                                                            | Nails                                                                   | Nails                                             |
| Diameter                           | [mm]    | 2.50                                                             | 2.50                                                                    | 2.50                                              |
| Length                             | [mm]    | 65                                                               | 65                                                                      | 65                                                |
| Other characteristics              |         | 2 nails at beam-plank intersection                               | 2 nails at beam-plank intersection                                      | 2 nails at beam-plank intersection                |
| <b>Properties of strengthening</b> |         |                                                                  |                                                                         |                                                   |
| Type of strengthening              |         | Not applicable (as-built sample)                                 | Overlay of OSB panels arranged orthogonal to joists                     | Overlay of OSB panels arranged parallel to joists |
| Width                              | [mm]    | -                                                                | 1000                                                                    | 1000                                              |
| Thickness                          | [mm]    | -                                                                | 25                                                                      | 25                                                |
| Length                             | [mm]    | -                                                                | 3160                                                                    | 3160                                              |
| Fastener type                      |         | -                                                                | Nails                                                                   | Screws                                            |
| Diameter                           | [mm]    | -                                                                | 2.80                                                                    | 6.0                                               |
| Length                             | [mm]    | -                                                                | 90                                                                      | 160                                               |
| Other characteristics              |         | -                                                                | 100 mm spacing along panels' perimeter, in correspondence of the joists | 150 mm spacing in correspondence of the joists    |
| <b>In-plane stiffness</b>          |         |                                                                  |                                                                         |                                                   |
| Value reported in the publication  | [kN/mm] | 0.53                                                             | 1.77                                                                    | 1.97                                              |
| Value at 0.1% drift                | [kN/mm] | 0.55                                                             | 2.55                                                                    | 5.05                                              |
| Value at 1.0% drift                | [kN/mm] | 0.09                                                             | 0.57                                                                    | 1.19                                              |
| Value at yielding (and drift)      | [kN/mm] | 0.55 (0.1%)                                                      | 3.12 (0.07%)                                                            | 4.27 (0.13%)                                      |
| <b>Equivalent shear stiffness</b>  |         |                                                                  |                                                                         |                                                   |
| Value calculated from publication  | [N/mm]  | 560                                                              | 1870                                                                    | 2080                                              |
| Value at 0.1% drift                | [N/mm]  | 582                                                              | 2691                                                                    | 5320                                              |
| Value at 1.0% drift                | [N/mm]  | 97                                                               | 606                                                                     | 1259                                              |
| Value at yielding                  | [N/mm]  | 582                                                              | 3290                                                                    | 4496                                              |

**Table S5.** Characteristics of the as-built and strengthened floors tested by Peralta et al. (2004) and different values of their in-plane stiffness.

| <b>Test configuration</b>          |         | Horizontal, whole floor, with 2 points of application of load |                                                                             |                                                                                                                                                     |
|------------------------------------|---------|---------------------------------------------------------------|-----------------------------------------------------------------------------|-----------------------------------------------------------------------------------------------------------------------------------------------------|
| <b>Specimen name</b>               |         | <i>MAE-2 (O)</i>                                              | <i>MAE-2B (S)</i>                                                           | <i>MAE-2C (S)</i>                                                                                                                                   |
| <b>Floor dimensions</b>            |         |                                                               |                                                                             |                                                                                                                                                     |
| Orthogonal to load                 | [mm]    | 7320                                                          | 7320                                                                        | 7320                                                                                                                                                |
| Parallel to load                   | [mm]    | 3660                                                          | 3660                                                                        | 3660                                                                                                                                                |
| Total thickness                    | [mm]    | 254                                                           | 264                                                                         | 264                                                                                                                                                 |
| <b>Properties of main beams</b>    |         |                                                               |                                                                             |                                                                                                                                                     |
| Width                              | [mm]    | 38                                                            | 38                                                                          | 38                                                                                                                                                  |
| Height                             | [mm]    | 235                                                           | 235                                                                         | 235                                                                                                                                                 |
| Length                             | [mm]    | 3660                                                          | 3660                                                                        | 3660                                                                                                                                                |
| Heart-to-heart distance            | [mm]    | 406                                                           | 406                                                                         | 406                                                                                                                                                 |
| Material                           |         | Pine wood                                                     | Pine wood                                                                   | Pine wood                                                                                                                                           |
| <b>Properties of planking</b>      |         |                                                               |                                                                             |                                                                                                                                                     |
| Width                              | [mm]    | 140                                                           | 140                                                                         | 140                                                                                                                                                 |
| Thickness                          | [mm]    | 19                                                            | 19                                                                          | 19                                                                                                                                                  |
| Length                             | [mm]    | From 1630 to 3660                                             | From 1630 to 3660                                                           | From 1630 to 3660                                                                                                                                   |
| Material                           |         | Pine wood                                                     | Pine wood                                                                   | Pine wood                                                                                                                                           |
| Other characteristics              |         | Straight-edged planks                                         | Straight-edged planks                                                       | Straight-edged planks                                                                                                                               |
| <b>Beams-planks connections</b>    |         |                                                               |                                                                             |                                                                                                                                                     |
| Fastener type                      |         | Nails                                                         | Nails                                                                       | Nails                                                                                                                                               |
| Diameter                           | [mm]    | 3.50                                                          | 3.50                                                                        | 3.50                                                                                                                                                |
| Length                             | [mm]    | 76                                                            | 76                                                                          | 76                                                                                                                                                  |
| Other characteristics              |         | 2 or 3 nails at beam-plank intersection                       | 2 or 3 nails at beam-plank intersection                                     | 2 or 3 nails at beam-plank intersection                                                                                                             |
| <b>Properties of strengthening</b> |         |                                                               |                                                                             |                                                                                                                                                     |
| Type of strengthening              |         | Not applicable (as-built sample)                              | Unblocked plywood panels overlay                                            | Blocked plywood panels overlay                                                                                                                      |
| Width                              | [mm]    | -                                                             | 1200                                                                        | 1200                                                                                                                                                |
| Thickness                          | [mm]    | -                                                             | 9.5                                                                         | 9.5                                                                                                                                                 |
| Length                             | [mm]    | -                                                             | 2400                                                                        | 2400                                                                                                                                                |
| Fastener type                      |         | -                                                             | Nails                                                                       | Nails                                                                                                                                               |
| Diameter                           | [mm]    | -                                                             | 3.50                                                                        | 3.50                                                                                                                                                |
| Length                             | [mm]    | -                                                             | 76                                                                          | 76                                                                                                                                                  |
| Other characteristics              |         | -                                                             | 152 mm spacing on supported edges, 305 mm spacing along intermediate joists | 51 mm spacing at the diaphragm boundaries, 76 mm spacing on panel edges; additional toenailing 38x89 mm boards between the joists below panel edges |
| <b>In-plane stiffness</b>          |         |                                                               |                                                                             |                                                                                                                                                     |
| Value reported in the publication  | [kN/mm] | 1.80                                                          | 8.40                                                                        | 11.30                                                                                                                                               |
| Value at 0.1% drift                | [kN/mm] | 5.84                                                          | 10.96                                                                       | 17.96                                                                                                                                               |
| Value at 1.0% drift                | [kN/mm] | 1.42                                                          | 2.34 <sup>(a)</sup>                                                         | 5.22 <sup>(a)</sup>                                                                                                                                 |
| Value at yielding (and drift)      | [kN/mm] | 5.84 (0.1%)                                                   | 7.76 (0.12%)                                                                | 13.93 (0.18%)                                                                                                                                       |
| <b>Equivalent shear stiffness</b>  |         |                                                               |                                                                             |                                                                                                                                                     |
| Value calculated from publication  | [N/mm]  | 600                                                           | 2800                                                                        | 3767                                                                                                                                                |
| Value at 0.1% drift                | [N/mm]  | 1949                                                          | 3653                                                                        | 5990                                                                                                                                                |
| Value at 1.0% drift                | [N/mm]  | 475                                                           | 780                                                                         | 1743                                                                                                                                                |
| Value at yielding                  | [N/mm]  | 1949                                                          | 2400                                                                        | 4644                                                                                                                                                |

<sup>(a)</sup> Values obtained from an extrapolation of the experimental curve and not directly from it, because the test was stopped slightly before this drift value.

**Table S6.** Characteristics of the as-built and strengthened floors tested by Brignola et al. (2012) and different values of their in-plane stiffness.

| <b>Test configuration</b>          |         | Horizontal, whole floor, with 2 points of application of load |                                                           |
|------------------------------------|---------|---------------------------------------------------------------|-----------------------------------------------------------|
| <b>Specimen name</b>               |         | <i>AB-1 (O)</i>                                               | <i>R-1 (S)</i>                                            |
| <b>Floor dimensions</b>            |         |                                                               |                                                           |
| Orthogonal to load                 | [mm]    | 4000                                                          | 4000                                                      |
| Parallel to load                   | [mm]    | 3000                                                          | 3000                                                      |
| Total thickness                    | [mm]    | 275                                                           | 294                                                       |
| <b>Properties of main beams</b>    |         |                                                               |                                                           |
| Width                              | [mm]    | 50                                                            | 50                                                        |
| Height                             | [mm]    | 250                                                           | 250                                                       |
| Length                             | [mm]    | 4000                                                          | 4000                                                      |
| Heart-to-heart distance            | [mm]    | 500                                                           | 500                                                       |
| Material                           |         | Radiata pine wood                                             | Radiata pine wood                                         |
| <b>Properties of planking</b>      |         |                                                               |                                                           |
| Width                              | [mm]    | 150                                                           | 150                                                       |
| Thickness                          | [mm]    | 25                                                            | 25                                                        |
| Length                             | [mm]    | 1000, 2000                                                    | 1000, 2000                                                |
| Material                           |         | Pine wood                                                     | Pine wood                                                 |
| Other characteristics              |         | Straight-edged planks                                         | Straight-edged planks                                     |
| <b>Beams-planks connections</b>    |         |                                                               |                                                           |
| Fastener type                      |         | Nails                                                         | Nails                                                     |
| Diameter                           | [mm]    | 3.15                                                          | 3.15                                                      |
| Length                             | [mm]    | 75                                                            | 75                                                        |
| Other characteristics              |         | 2 or 4 nails for each intersection between beam and plank     | 2 or 4 nails for each intersection between beam and plank |
| <b>Properties of strengthening</b> |         |                                                               |                                                           |
| Type of strengthening              |         | Not applicable (as-built sample)                              | Plywood panels overlay                                    |
| Width                              | [mm]    | -                                                             | 1200                                                      |
| Thickness                          | [mm]    | -                                                             | 19                                                        |
| Length                             | [mm]    | -                                                             | 2400                                                      |
| Fastener type                      |         | -                                                             | Screws                                                    |
| Diameter                           | [mm]    | -                                                             | 4.2                                                       |
| Length                             | [mm]    | -                                                             | 50 (120 in correspondence of joists)                      |
| Other characteristics              |         | -                                                             | 150 mm spacing along both panel edges and joists          |
| <b>In-plane stiffness</b>          |         |                                                               |                                                           |
| Value reported in the publication  | [kN/mm] | 1.36                                                          | 6.65                                                      |
| Value at 0.1% drift                | [kN/mm] | 3.06                                                          | 14.70                                                     |
| Value at 1.0% drift                | [kN/mm] | 1.16                                                          | 5.20                                                      |
| Value at yielding                  | [kN/mm] | 3.02 (at 0.18% drift)                                         | 12.4 (at 0.16% drift)                                     |
| <b>Equivalent shear stiffness</b>  |         |                                                               |                                                           |
| Value calculated from publication  | [N/mm]  | 340                                                           | 1665                                                      |
| Value at 0.1% drift                | [N/mm]  | 769                                                           | 3675                                                      |
| Value at 1.0% drift                | [N/mm]  | 290                                                           | 1300                                                      |
| Value at yielding                  | [N/mm]  | 756                                                           | 3102                                                      |



**Table S7.** Characteristics of the as-built and strengthened floors tested by Giongo et al. (2013) and values of their in-plane stiffness.

| <b>Test configuration</b>          |         | Horizontal, whole floor, with 4 points of application of load |                                                                                                                    |
|------------------------------------|---------|---------------------------------------------------------------|--------------------------------------------------------------------------------------------------------------------|
| <b>Specimen name</b>               |         | 26_B_asB (O)                                                  | 35_B_Plyw (S)                                                                                                      |
| <b>Floor dimensions</b>            |         |                                                               |                                                                                                                    |
| Orthogonal to load                 | [mm]    | 9600                                                          | 9600                                                                                                               |
| Parallel to load                   | [mm]    | 4700                                                          | 4700                                                                                                               |
| Total thickness                    | [mm]    | 322                                                           | 331                                                                                                                |
| <b>Properties of main beams</b>    |         |                                                               |                                                                                                                    |
| Width                              | [mm]    | 50                                                            | 50                                                                                                                 |
| Height                             | [mm]    | 300                                                           | 300                                                                                                                |
| Length                             | [mm]    | 4800                                                          | 4800                                                                                                               |
| Heart-to-heart distance            | [mm]    | 450                                                           | 450                                                                                                                |
| Material                           |         | Rimu wood                                                     | Rimu wood                                                                                                          |
| <b>Properties of planking</b>      |         |                                                               |                                                                                                                    |
| Width                              | [mm]    | 130                                                           | 130                                                                                                                |
| Thickness                          | [mm]    | 22                                                            | 22                                                                                                                 |
| Length                             | [mm]    | 2350, 4700                                                    | 2350, 4700                                                                                                         |
| Material                           |         | Matai wood                                                    | Matai wood                                                                                                         |
| Other characteristics              |         | Tongue-and-groove planks                                      | Tongue-and-groove planks                                                                                           |
| <b>Beams-planks connections</b>    |         |                                                               |                                                                                                                    |
| Fastener type                      |         | Nails                                                         | Nails                                                                                                              |
| Diameter                           | [mm]    | Not mentioned                                                 | Not mentioned                                                                                                      |
| Length                             | [mm]    | Not mentioned                                                 | Not mentioned                                                                                                      |
| Other characteristics              |         | 2 nails for each intersection between beam and plank          | 2 nails for each intersection between beam and plank                                                               |
| <b>Properties of strengthening</b> |         |                                                               |                                                                                                                    |
| Type of strengthening              |         | Not applicable (as-built sample)                              | Plywood panels overlay                                                                                             |
| Width                              | [mm]    | -                                                             | 1200                                                                                                               |
| Thickness                          | [mm]    | -                                                             | 9                                                                                                                  |
| Length                             | [mm]    | -                                                             | 2400                                                                                                               |
| Fastener type                      |         | -                                                             | Screws                                                                                                             |
| Diameter                           | [mm]    | -                                                             | 3.5 (4.2 along floor's perimeter)                                                                                  |
| Length                             | [mm]    | -                                                             | 30 (60 along floor's perimeter)                                                                                    |
| Other characteristics              |         | -                                                             | 150 mm spacing along panel edges, 300 mm spacing on the whole panels' area, 100 mm spacing along floor's perimeter |
| <b>In-plane stiffness</b>          |         |                                                               |                                                                                                                    |
| Value at 0.1% drift                | [kN/mm] | 1.16                                                          | 10.70                                                                                                              |
| Value at 1.0% drift                | [kN/mm] | 0.65                                                          | 3.69                                                                                                               |
| Value at yielding                  | [kN/mm] | 1.00 (at 0.25% drift)                                         | 10.70 (at 0.1% drift)                                                                                              |
| <b>Equivalent shear stiffness</b>  |         |                                                               |                                                                                                                    |
| Value at 0.1% drift                | [N/mm]  | 302                                                           | 2783                                                                                                               |
| Value at 1.0% drift                | [N/mm]  | 169                                                           | 961                                                                                                                |
| Value at yielding                  | [N/mm]  | 260                                                           | 2783                                                                                                               |

**Table S8.** Characteristics of the as-built and strengthened floors tested by Wilson et al. (2014) and values of their in-plane stiffness.

| <b>Test configuration</b>          |         | Horizontal, whole floor, 4 load points        |                                                                              | Horizontal, whole floor, 2 load points        |                                                                   |
|------------------------------------|---------|-----------------------------------------------|------------------------------------------------------------------------------|-----------------------------------------------|-------------------------------------------------------------------|
| <b>Specimen name</b>               |         | <i>1a-PARA (O)</i>                            | <i>1b-PARA (S)</i>                                                           | <i>1a-PERP (O)</i>                            | <i>1b-PERP (S)</i>                                                |
| <b>Floor dimensions</b>            |         |                                               |                                                                              |                                               |                                                                   |
| Orthogonal to load                 | [mm]    | 10400                                         | 10400                                                                        | 5500                                          | 2120                                                              |
| Parallel to load                   | [mm]    | 5500                                          | 5500                                                                         | 10400                                         | 2120                                                              |
| Total thickness                    | [mm]    | 308                                           | 323                                                                          | 308                                           | 323                                                               |
| <b>Properties of main beams</b>    |         |                                               |                                                                              |                                               |                                                                   |
| Width                              | [mm]    | 45                                            | 45                                                                           | 45                                            | 45                                                                |
| Height                             | [mm]    | 290                                           | 290                                                                          | 290                                           | 290                                                               |
| Length                             | [mm]    | 5500                                          | 5500                                                                         | 5500                                          | 5500                                                              |
| Heart-to-heart distance            | [mm]    | 400                                           | 400                                                                          | 400                                           | 400                                                               |
| Material                           |         | MSG8 timber                                   | MSG8 timber                                                                  | MSG8 timber                                   | MSG8 timber                                                       |
| <b>Properties of planking</b>      |         |                                               |                                                                              |                                               |                                                                   |
| Width                              | [mm]    | 135                                           | 135                                                                          | 135                                           | 135                                                               |
| Thickness                          | [mm]    | 18                                            | 18                                                                           | 18                                            | 18                                                                |
| Length                             | [mm]    | 1600-5200                                     | 1600-5200                                                                    | 1600-5200                                     | 1600-5200                                                         |
| Material                           |         | MSG8 timber                                   | MSG8 timber                                                                  | MSG8 timber                                   | MSG8 timber                                                       |
| Other characteristics              |         | Straight-edged planks                         | Straight-edged planks                                                        | Straight-edged planks                         | Straight-edged planks                                             |
| <b>Beams-planks connections</b>    |         |                                               |                                                                              |                                               |                                                                   |
| Fastener type                      |         | Nails                                         | Nails                                                                        | Nails                                         | Nails                                                             |
| Diameter                           | [mm]    | 3.15                                          | 3.15                                                                         | 3.15                                          | 3.15                                                              |
| Length                             | [mm]    | 75                                            | 75                                                                           | 75                                            | 75                                                                |
| Other characteristics              |         | 2 or 4 nails for each beam-plank intersection | 2 or 4 nails for each beam-plank intersection                                | 2 or 4 nails for each beam-plank intersection | 2 or 4 nails for each beam-plank intersection                     |
| <b>Properties of strengthening</b> |         |                                               |                                                                              |                                               |                                                                   |
| Type of strengthening              |         | Not applicable (as-built sample)              | Plywood panels overlay                                                       | Not applicable (as-built sample)              | Plywood panels overlay                                            |
| Width                              | [mm]    | -                                             | 1200                                                                         | -                                             | 1200                                                              |
| Thickness                          | [mm]    | -                                             | 15                                                                           | -                                             | 15                                                                |
| Length                             | [mm]    | -                                             | 2400                                                                         | -                                             | 2400                                                              |
| Other characteristics              |         | -                                             | Metal straps stapled on panel edges; blocking and chords on long floor edges | -                                             | Metal straps stapled on panel edges; blocking on long floor edges |
| Fastener type                      |         | -                                             | Nails                                                                        | -                                             | Nails                                                             |
| Diameter                           | [mm]    | -                                             | 3.15                                                                         | -                                             | 3.15                                                              |
| Length                             | [mm]    | -                                             | 75                                                                           | -                                             | 75                                                                |
| Other characteristics              |         | -                                             | 300 mm spacing along joists, 100 at floor's edges                            | -                                             | 300 mm spacing along joists, 100 at floor's edges                 |
| <b>In-plane stiffness</b>          |         |                                               |                                                                              |                                               |                                                                   |
| Value reported in the publication  | [kN/mm] | 0.64                                          | 14.52                                                                        | 1.61                                          | 22.41                                                             |
| Value at 0.1% drift                | [kN/mm] | 2.06                                          | 19.55                                                                        | 5.34                                          | 30.89                                                             |
| Value at 1.0% drift                | [kN/mm] | 0.47                                          | 3.66                                                                         | 1.54                                          | 7.15                                                              |
| Value at yielding (and drift)      | [kN/mm] | 2.06 (0.1%)                                   | 15.00 (0.15%)                                                                | 3.75 (0.14%)                                  | 30.89 (0.1%)                                                      |
| <b>Equivalent shear stiffness</b>  |         |                                               |                                                                              |                                               |                                                                   |
| Value calculated from publication  | [N/mm]  | 198                                           | 4459                                                                         | 134                                           | 1864                                                              |
| Value at 0.1% drift                | [N/mm]  | 637                                           | 3294                                                                         | 441                                           | 1402                                                              |
| Value at 1.0% drift                | [N/mm]  | 148                                           | 1140                                                                         | 128                                           | 595                                                               |
| Value at yielding                  | [N/mm]  | 637                                           | 2533                                                                         | 313                                           | 1402                                                              |

**Table S9.** Characteristics of the as-built and strengthened floors tested by Mirra et al. (2020) in the direction parallel to the joists, and values of their in-plane stiffness.

| <b>Test configuration</b>          |         | Vertical, half of the floor, 1 point of application of load |                                          |                                                                |                                                                |
|------------------------------------|---------|-------------------------------------------------------------|------------------------------------------|----------------------------------------------------------------|----------------------------------------------------------------|
| <b>Specimen name</b>               |         | <i>DFpar-1 (O)</i>                                          | <i>DFpar-2 (O)</i>                       | <i>DFpar-1s (S)</i>                                            | <i>DFpar-2s (S)</i>                                            |
| <b>Floor dimensions</b>            |         |                                                             |                                          |                                                                |                                                                |
| Orthogonal to load                 | [mm]    | 2400                                                        | 2400                                     | 2400                                                           | 2400                                                           |
| Parallel to load                   | [mm]    | 3800                                                        | 3960                                     | 3800                                                           | 3960                                                           |
| Total thickness                    | [mm]    | 148                                                         | 154                                      | 166                                                            | 172                                                            |
| <b>Properties of main beams</b>    |         |                                                             |                                          |                                                                |                                                                |
| Width                              | [mm]    | 60                                                          | 60                                       | 60                                                             | 60                                                             |
| Height                             | [mm]    | 130                                                         | 130                                      | 130                                                            | 130                                                            |
| Length                             | [mm]    | 3800                                                        | 3960                                     | 3800                                                           | 3960                                                           |
| Heart-to-heart distance            | [mm]    | 650                                                         | 650                                      | 650                                                            | 650                                                            |
| Material                           |         | C24 timber                                                  | C24 timber                               | C24 timber                                                     | C24 timber                                                     |
| <b>Properties of planking</b>      |         |                                                             |                                          |                                                                |                                                                |
| Width                              | [mm]    | 165                                                         | 165                                      | 165                                                            | 165                                                            |
| Thickness                          | [mm]    | 18                                                          | 24                                       | 18                                                             | 24                                                             |
| Length                             | [mm]    | 2400                                                        | 2400                                     | 2400                                                           | 2400                                                           |
| Material                           |         | C24 timber                                                  | C24 timber                               | C24 timber                                                     | C24 timber                                                     |
| Other characteristics              |         | Tongue-and-groove planks                                    | Tongue-and-groove planks                 | Tongue-and-groove planks                                       | Tongue-and-groove planks                                       |
| <b>Beams-planks connections</b>    |         |                                                             |                                          |                                                                |                                                                |
| Fastener type                      |         | Nails                                                       | Nails                                    | Nails                                                          | Nails                                                          |
| Diameter                           | [mm]    | 3.0                                                         | 3.0                                      | 3.0                                                            | 3.0                                                            |
| Length                             | [mm]    | 65                                                          | 65                                       | 65                                                             | 65                                                             |
| Other characteristics              |         | 2 nails for each beam-plank intersection                    | 2 nails for each beam-plank intersection | 2 nails for each beam-plank intersection                       | 2 nails for each beam-plank intersection                       |
| <b>Properties of strengthening</b> |         |                                                             |                                          |                                                                |                                                                |
| Type of strengthening              |         | Not applicable (as-built sample)                            | Not applicable (as-built sample)         | Plywood panels overlay                                         | Plywood panels overlay                                         |
| Width                              | [mm]    | -                                                           | -                                        | 600                                                            | 600                                                            |
| Thickness                          | [mm]    | -                                                           | -                                        | 18                                                             | 18                                                             |
| Length                             | [mm]    | -                                                           | -                                        | 1200                                                           | 1200                                                           |
| Other characteristics              |         | -                                                           | -                                        | Improvement of shear transfer with additional fasteners on top | Improvement of shear transfer with additional fasteners on top |
| Fastener type                      |         | -                                                           | -                                        | Screws                                                         | Screws                                                         |
| Diameter                           | [mm]    | -                                                           | -                                        | 4.5 (5.0 on top)                                               | 5.0                                                            |
| Length                             | [mm]    | -                                                           | -                                        | 40 (70 on top)                                                 | 60 (70 on top)                                                 |
| Other characteristics              |         | -                                                           | -                                        | 100 mm spacing along the panels' perimeter                     | 100 mm spacing along the panels' perimeter                     |
| <b>In-plane stiffness</b>          |         |                                                             |                                          |                                                                |                                                                |
| Value at 0.1% drift                | [kN/mm] | 0.74                                                        | 0.86                                     | 5.45                                                           | 6.32                                                           |
| Value at 1.0% drift                | [kN/mm] | 0.36                                                        | 0.47                                     | 2.02                                                           | 2.83                                                           |
| Value at yielding (and drift)      | [kN/mm] | 0.48 (0.28%)                                                | 0.57 (0.16%)                             | 5.70 (0.09%)                                                   | 5.61 (0.15%)                                                   |
| <b>Equivalent shear stiffness</b>  |         |                                                             |                                          |                                                                |                                                                |
|                                    |         | Size-dependent (flexural response)                          |                                          |                                                                |                                                                |
| Value at 0.1% drift                | [N/mm]  | 467                                                         | 521                                      | 3441                                                           | 3832                                                           |
| Value at 1.0% drift                | [N/mm]  | 227                                                         | 285                                      | 1277                                                           | 1717                                                           |
| Value at yielding                  | [N/mm]  | 303                                                         | 345                                      | 3600                                                           | 3403                                                           |

**Table S10.** Characteristics of the as-built and strengthened floors tested by Mirra et al. (2020) in the direction perpendicular to the joists, and different values of their in-plane stiffness.

| <b>Test configuration</b>          |         | Vertical, half of the floor, 1 point of application of load |                                          |                                            |                                                         |
|------------------------------------|---------|-------------------------------------------------------------|------------------------------------------|--------------------------------------------|---------------------------------------------------------|
| <b>Specimen name</b>               |         | <i>DFper-3 (O)</i>                                          | <i>DFper-4 (O)</i>                       | <i>DFper-3s (S)</i>                        | <i>DFper-4s (S)</i>                                     |
| <b>Floor dimensions</b>            |         |                                                             |                                          |                                            |                                                         |
| Orthogonal to load                 | [mm]    | 2300                                                        | 2300                                     | 2300                                       | 2300                                                    |
| Parallel to load                   | [mm]    | 3800                                                        | 3800                                     | 3800                                       | 3800                                                    |
| Total thickness                    | [mm]    | 128                                                         | 128                                      | 146                                        | 146                                                     |
| <b>Properties of main beams</b>    |         |                                                             |                                          |                                            |                                                         |
| Width                              | [mm]    | 50                                                          | 50                                       | 60                                         | 60                                                      |
| Height                             | [mm]    | 110                                                         | 110                                      | 130                                        | 130                                                     |
| Length                             | [mm]    | 2300                                                        | 2300                                     | 3800                                       | 3960                                                    |
| Heart-to-heart distance            | [mm]    | 750                                                         | 750                                      | 650                                        | 650                                                     |
| Material                           |         | C24 timber                                                  | C24 timber                               | C24 timber                                 | C24 timber                                              |
| <b>Properties of planking</b>      |         |                                                             |                                          |                                            |                                                         |
| Width                              | [mm]    | 165                                                         | 165                                      | 165                                        | 165                                                     |
| Thickness                          | [mm]    | 18                                                          | 18                                       | 18                                         | 24                                                      |
| Length                             | [mm]    | 3800                                                        | 3800                                     | 2400                                       | 2400                                                    |
| Material                           |         | C24 timber                                                  | C24 timber                               | C24 timber                                 | C24 timber                                              |
| Other characteristics              |         | Tongue-and-groove planks                                    | Tongue-and-groove planks                 | Tongue-and-groove planks                   | Tongue-and-groove planks                                |
| <b>Beams-planks connections</b>    |         |                                                             |                                          |                                            |                                                         |
| Fastener type                      |         | Nails                                                       | Nails                                    | Nails                                      | Nails                                                   |
| Diameter                           | [mm]    | 3.0                                                         | 3.0                                      | 3.0                                        | 3.0                                                     |
| Length                             | [mm]    | 65                                                          | 65                                       | 65                                         | 65                                                      |
| Other characteristics              |         | 2 nails for each beam-plank intersection                    | 2 nails for each beam-plank intersection | 2 nails for each beam-plank intersection   | 2 nails for each beam-plank intersection                |
| <b>Properties of strengthening</b> |         |                                                             |                                          |                                            |                                                         |
| Type of strengthening              |         | Not applicable (as-built sample)                            | Not applicable (as-built sample)         | Plywood panels overlay                     | Plywood panels overlay                                  |
| Width                              | [mm]    | -                                                           | -                                        | 600                                        | 600                                                     |
| Thickness                          | [mm]    | -                                                           | -                                        | 18                                         | 18                                                      |
| Length                             | [mm]    | -                                                           | -                                        | 1200                                       | 1200                                                    |
| Other characteristics              |         | -                                                           | -                                        | -                                          | Improvement of shear transfer with timber blocks on top |
| Fastener type                      |         | -                                                           | -                                        | Screws                                     | Screws                                                  |
| Diameter                           | [mm]    | -                                                           | -                                        | 5.0                                        | 5.0                                                     |
| Length                             | [mm]    | -                                                           | -                                        | 60                                         | 60                                                      |
| Other characteristics              |         | -                                                           | -                                        | 100 mm spacing along the panels' perimeter | 100 mm spacing along the panels' perimeter              |
| <b>In-plane stiffness</b>          |         |                                                             |                                          |                                            |                                                         |
| Value at 0.1% drift                | [kN/mm] | 0.33                                                        | 0.21                                     | 1.88                                       | 5.28                                                    |
| Value at 1.0% drift                | [kN/mm] | 0.11                                                        | 0.10                                     | 1.21                                       | 2.93                                                    |
| Value at yielding (and drift)      | [kN/mm] | 0.25 (0.15%)                                                | 0.21 (0.1%)                              | 1.56 (0.45%)                               | 4.11 (0.26%)                                            |
| <b>Equivalent shear stiffness</b>  |         |                                                             |                                          |                                            |                                                         |
|                                    |         | Size-dependent (flexural response)                          |                                          |                                            |                                                         |
| Value at 0.1% drift                | [N/mm]  | 200                                                         | 127                                      | 1136                                       | 3196                                                    |
| Value at 1.0% drift                | [N/mm]  | 67                                                          | 60                                       | 735                                        | 1773                                                    |
| Value at yielding                  | [N/mm]  | 151                                                         | 127                                      | 946                                        | 2488                                                    |

**Table S11.** Characteristics of the as-built and strengthened roof tested by Mirra et al. (2020) and different values of its in-plane stiffness.

| <b>Test configuration</b>                      |         | Vertical, one roof pitch, 1 point of application of load |                                                                                       |
|------------------------------------------------|---------|----------------------------------------------------------|---------------------------------------------------------------------------------------|
| <b>Specimen name</b>                           |         | <i>DRpar-5 (O)</i>                                       | <i>DRpar-5s (S)</i>                                                                   |
| <b>Floor dimensions</b>                        |         |                                                          |                                                                                       |
| Orthogonal to load                             | [mm]    | 2730                                                     | 2730                                                                                  |
| Parallel to load                               | [mm]    | 3800                                                     | 3800                                                                                  |
| Total thickness                                | [mm]    | 148                                                      | 148 (same thickness because panels are placed in between the purlins)                 |
| <b>Properties of main beams (rafters)</b>      |         |                                                          |                                                                                       |
| Width                                          | [mm]    | 50                                                       | 50                                                                                    |
| Height                                         | [mm]    | 105                                                      | 105                                                                                   |
| Length                                         | [mm]    | 2730                                                     | 2730                                                                                  |
| Heart-to-heart distance                        | [mm]    | 925                                                      | 925                                                                                   |
| Material                                       |         | C24 timber                                               | C24 timber                                                                            |
| <b>Properties of secondary beams (purlins)</b> |         |                                                          |                                                                                       |
| Width                                          | [mm]    | 60                                                       | 60                                                                                    |
| Height                                         | [mm]    | 35                                                       | 35                                                                                    |
| Length                                         | [mm]    | 3800                                                     | 3800                                                                                  |
| Heart-to-heart distance                        | [mm]    | 820                                                      | 820                                                                                   |
| Material                                       |         | C24 timber                                               | C24 timber                                                                            |
| <b>Properties of planking</b>                  |         |                                                          |                                                                                       |
| Width                                          | [mm]    | 165                                                      | 165                                                                                   |
| Thickness                                      | [mm]    | 18                                                       | 18                                                                                    |
| Length                                         | [mm]    | 2730                                                     | 2400                                                                                  |
| Material                                       |         | C24 timber                                               | C24 timber                                                                            |
| Other characteristics                          |         | Tongue-and-groove planks                                 | Tongue-and-groove planks                                                              |
| <b>Beams-planks connections</b>                |         |                                                          |                                                                                       |
| Fastener type                                  |         | Nails                                                    | Nails                                                                                 |
| Diameter                                       | [mm]    | 3.0                                                      | 3.0                                                                                   |
| Length                                         | [mm]    | 55                                                       | 55                                                                                    |
| Other characteristics                          |         | 2 nails for each beam-plank intersection                 | 2 nails for each beam-plank intersection                                              |
| <b>Properties of strengthening</b>             |         |                                                          |                                                                                       |
| Type of strengthening                          |         | Not applicable (as-built sample)                         | Plywood panels overlay                                                                |
| Width                                          | [mm]    | -                                                        | 600                                                                                   |
| Thickness                                      | [mm]    | -                                                        | 18                                                                                    |
| Length                                         | [mm]    | -                                                        | 1200                                                                                  |
| Other characteristics                          |         | -                                                        | Improvement of connection and shear transfer with steel angles at bottom (wall plate) |
| Fastener type                                  |         | -                                                        | Screws                                                                                |
| Diameter                                       | [mm]    | -                                                        | 4.5 (6.0 for steel angle)                                                             |
| Length                                         | [mm]    | -                                                        | 40 (70 for steel angle)                                                               |
| Other characteristics                          |         | -                                                        | 100 mm spacing along the panels' perimeter                                            |
| <b>In-plane stiffness</b>                      |         |                                                          |                                                                                       |
| Value at 0.1% drift                            | [kN/mm] | 0.15                                                     | 3.42                                                                                  |
| Value at 1.0% drift                            | [kN/mm] | 0.06                                                     | 1.31                                                                                  |
| Value at yielding (and drift)                  | [kN/mm] | 0.15 (0.1%)                                              | 2.57 (0.4%)                                                                           |
| <b>Equivalent shear stiffness</b>              |         |                                                          |                                                                                       |
| Value at 0.1% drift                            | [N/mm]  | 108                                                      | 2457                                                                                  |
| Value at 1.0% drift                            | [N/mm]  | 41                                                       | 940                                                                                   |
| Value at yielding                              | [N/mm]  | 108                                                      | 1848                                                                                  |

## References

- Branco, J. M., M. Kekeliak, and P.B. Lourenço. 2015. "In-Plane Stiffness of Timber Floors Strengthened with CLT." *Eur. J. Wood Wood Prod.* 73, 313-323.
- Brignola, A., S. Pampanin, and S. Podestà. 2012. "Experimental Evaluation of the In-Plane Stiffness of Timber Diaphragms." *Earthquake Spectra* 28(4), 1–23.
- Corradi, M., E. Speranzini, A. Borri, and A. Vignoli. 2006. "In-Plane Shear Reinforcement of Wood Beam Floors With FRP." *Composites: Part B* 37, 310-319.
- Giongo, I., D. Dizhur, R. Tomasi, and J. M. Ingham. 2013. "In-plane assessment of existing timber diaphragms in URM buildings via quasi-static and dynamic in-situ tests." *Advanced Materials Research* 778, 495-502.
- Gubana, A., and M. Melotto. 2018. "Experimental tests on wood-based in-plane strengthening solutions for the seismic retrofit of traditional timber floors." *Constr. Build. Mater.* 191, 290–299.
- Mirra, M., G.J.P. Ravenshorst, J.W.G. van de Kuilen. 2020. "Experimental and analytical evaluation of the in-plane behaviour of as-built and strengthened traditional wooden floors". *Eng. Struct.* 211 <https://doi.org/10.1016/j.engstruct.2020.110432>
- Peralta, D.F., M.J. Bracci, and M.B.D. Hueste. 2004. "Seismic Behavior of Wood Diaphragms in Pre-1950s Unreinforced Masonry Buildings." *J. Struct. Eng.* 130 (12), [https://doi.org/10.1061/\(ASCE\)0733-9445\(2004\)130:12\(2040\)](https://doi.org/10.1061/(ASCE)0733-9445(2004)130:12(2040)).
- Valluzzi, M. R., E. Garbin, M. Dalla Benetta, and C. Modena. 2008. "Experimental Assessment and Modelling of In-Plane Behaviour of Timber Floors." 6<sup>th</sup> International Conference on Structural Analysis of Historical Constructions, Bath, U.K., CRC-Press, Balkema, 755-762.
- Valluzzi, M. R., E. Garbin, M. Dalla Benetta, and C. Modena. 2010. "In-Plane Strengthening of Timber Floors For The Seismic Improvement Of Masonry Buildings." World Conference on Timber Engineering, Riva del Garda, Italy.
- Wilson, A., P. J. H. Quenneville, and J. M. Ingham. 2014. "In-plane orthotropic behavior of timber floor diaphragms in unreinforced masonry buildings." *J. Struct. Eng.* 140 (1): 04013038. [https://doi.org/10.1061/\(ASCE\)ST.1943-541X.0000819](https://doi.org/10.1061/(ASCE)ST.1943-541X.0000819).
